# Supplementary material for: Loss of interleukin 33 expression in colonic crypts - a potential marker for disease remission in ulcerative colitis
Source: PubMed Central journal article supplement (PMC5066310; doi:10.1038/srep35403), 2016-10-17
Supplement: srep35403-s1.pdf [file srep35403-s1.pdf]

Supplementary information

**Loss of interleukin 33 expression in colonic crypts - a potential marker for disease remission in ulcerative colitis.**

Mona Dixon Gundersen<sup>1</sup>, Rasmus Goll<sup>1</sup>, Johanna Hol<sup>2</sup>, Trine Olsen<sup>1</sup>, Renate Rismo<sup>1</sup>, Sveinung W. Sørbye<sup>1</sup>, Olav Sundnes<sup>2</sup>, Guttorm Haraldsen<sup>2</sup> & Jon Florholmen<sup>1</sup>.

**Table S1. Interrater variability.**

**a**

|                    | <b>Rater 1</b>    |                    |                    |                    |                    |              |
|--------------------|-------------------|--------------------|--------------------|--------------------|--------------------|--------------|
| <b>Rater 2</b>     | <b>0 (&lt;1%)</b> | <b>1 (&lt;10%)</b> | <b>2 (&lt;25%)</b> | <b>3 (&lt;50%)</b> | <b>4 (&gt;50%)</b> | <b>Total</b> |
| <b>0 (&lt;1%)</b>  | 58                | 2                  | 0                  | 0                  | 0                  | 60           |
| <b>1 (&lt;10%)</b> | 3                 | 7                  | 0                  | 0                  | 0                  | 10           |
| <b>2 (&lt;25%)</b> | 0                 | 2                  | 0                  | 0                  | 0                  | 2            |
| <b>3 (&lt;50%)</b> | 0                 | 0                  | 2                  | 3                  | 2                  | 7            |
| <b>4 (&gt;50%)</b> | 0                 | 0                  | 0                  | 3                  | 2                  | 5            |
| <b>Total</b>       | 61                | 11                 | 2                  | 6                  | 4                  | 84           |

**b**

|                    | <b>0 (&lt;1%)</b> | <b>1 (&lt;10%)</b> | <b>2 (&lt;25%)</b> | <b>3 (&lt;50%)</b> | <b>4 (&gt;50%)</b> |
|--------------------|-------------------|--------------------|--------------------|--------------------|--------------------|
| <b>0 (&lt;1%)</b>  | 1                 | 0.75               | 0.5                | 0.25               | 0                  |
| <b>1 (&lt;10%)</b> | 0.75              | 1                  | 0.75               | 0.5                | 0.25               |
| <b>2 (&lt;25%)</b> | 0.5               | 0.75               | 1                  | 0.75               | 0.5                |
| <b>3 (&lt;50%)</b> | 0.25              | 0.5                | 0.75               | 1                  | 0.75               |
| <b>4 (&gt;50%)</b> | 0                 | 0.25               | 0.5                | 0.75               | 1                  |

**Table S1. Interrater variability**

Interrater variability was determined with a weighted Cohen’s kappa yielding a coefficient of 0.83 indicating good agreement between raters. Table **a** shows the rawdata for quantification of n= 84 representative slides divided into 5 groups according to percentage of positive interleukin 33 cells. Table **b** shows the weights given for categories.

**Supplementary Table S2. Primer sequences.**

| <b>Genebank ID (HGNC)</b> | <b>Forward primer sequence 5'-3'</b><br><b>Reverse primer 5'-3'</b> | <b>Probe sequence 5'-3'</b>     | <b>Reference sequence</b> |
|---------------------------|---------------------------------------------------------------------|---------------------------------|---------------------------|
| <b>IL33</b>               | TGAGTCTCAACACCCCTCAAATG<br>GGCATGCAACCAGAAGTCTTTT                   | CAGGTGACGGTGTGATGGTAAGATGTTAATG | NM_033439.3               |
| <b>IL1RL1</b>             | ACACCTGTAAATTTATACACAATGA<br>CCTTGCTCATCCTTGACC                     | CCTGGTCGCCGTCACACTAT            | NM_NM_016232.4            |
| <b>TNF</b>                | CACGCTCTTCTGCCTGCTG<br>GATCTGACTGCCTGGGC                            | CCAGAGGGAAGAGTTCCCCAGGGAC       | NM_000594.3               |
| <b>IL1B</b>               | CCTGAGCTCGCCAGTGAAA<br>TTTAGGGCCATCAGCTTCAAA                        | ATGGCTTATTACAGTGGCAATGAGGATGACT | NM_000576.2               |
| <b>IL4</b>                | CGGCTCGACAGGAACCTCT<br>TCCAAGAAGTTTTCCAACGTACTCT                    | CGGGCTTGAATTCCTGTCCTGTGAAG      | NM_000589.3               |
| <b>IL17A</b>              | TGATTGGAAGAAACAACGATGACT<br>ATTGTGATTCCTGCCTTCACTATG                | TGGTGTCACTGCTACTGCTGCTGAGC      | NM_002190.2               |
| <b>IL23A</b>              | CCCAAGGACTCAGGGACAAC<br>TCCTAGCAGCTTCTCATAAAAAATCA                  | TCAGTTCTGCTTGCAAAGGATCCACCAG    | NM_016584.2               |
| <b>TGFB1</b>              | CTGCTGAGGCTCAAGTTAAAAGTG<br>TGAGGTATCGCCAGGAATTGT                   | CAGCACGTGGAGCTGTACCAGAAATACAGC  | NM_000660.5               |
| <b>ACTB</b>               | TGCCGACAGGATGCAGAAG<br>GCCGATCCACACGGAGTACT                         | AGATCAAGATCATTGCTCCTCCTGAGCGC   | NM_001101.3               |

\* IFNG was supplied by (Applied Biosystems, Hs00174143\_m1)
